# Supplementary material
Source: ML conference proceedings conference paper supplement (https://proceedings.neurips.cc/paper_files/paper/2019/hash/a29d1598024f9e87beab4b98411d48ce-Abstract.html)
Supplement: Supplementary file [file a29d1598024f9e87beab4b98411d48ce-Supplemental.zip]

## A Details of Multi-Head Attention Unit

The  $MultiHeadAttn(\cdot)$  function takes  $k + 1$  vectors ( $\mathbf{e}_0, \mathbf{e}_1, \dots, \mathbf{e}_k$ ) as input and output  $k + 1$  vectors. It contains  $L$  attention units and each of them independently aggregates the input vectors and obtain

$$\mathbf{h}_n^l = \sum_{j=0}^n \alpha_{jn}^l \mathbf{W}_V \mathbf{e}_j,$$

where  $\alpha_{jn}^l$  is the attention weights from the  $j$ -th element to the  $n$ -th element given by the  $l$ -th attention head and

$$\alpha_{jn}^l = \frac{\exp((\mathbf{W}_K \mathbf{e}_j)^\top \mathbf{W}_Q \mathbf{e}_n)}{\sum_{i=0}^n \exp((\mathbf{W}_K \mathbf{e}_i)^\top \mathbf{W}_Q \mathbf{e}_n)},$$

where  $\mathbf{W}_V \in \mathbb{R}^{D \times D}$ ,  $\mathbf{W}_K \in \mathbb{R}^{D \times D}$  and  $\mathbf{W}_Q \in \mathbb{R}^{D \times D}$  are three transformation matrices for value, key and query, respectively. Then the final representation  $\mathbf{h}_n$  could be given by combining the outputs of each single-head attention function,

$$\mathbf{h}_n^\top = \mathbf{W}_O[(\mathbf{h}_n^1)^\top, \dots, (\mathbf{h}_n^L)^\top], n = 0, 1, \dots, k,$$

where  $\mathbf{W}_O \in \mathbb{R}^{S \times L}$  is a matrix and  $S = D \cdot L$ . Here, the  $n$ -th output representation only takes the first  $n + 1$  vectors as input and masks other input vectors, which could guarantee the causality property in our setting.

## B Proofs in Section 2

### B.1 Proof for Theorem 2

The proof is by construction. We know that each random walk would realize a path from the source event marker to the sampled marker. Consider a probability space  $(\Omega, \mathcal{F}, P)$  where  $\Omega$  denotes a sample space including all possible outcomes,  $\mathcal{F}$  is an event space and  $P$  represents probability assignment of all events. In the random walk experiment,  $\Omega = \cup_{m_j \in \mathcal{D}_k} \mathcal{P}_j^k = \{P_{j,c}^k | P_{j,c}^k \in \mathcal{P}_j^k, m_j \in \mathcal{D}_k\}$  contains all possible paths from the source event marker to any marker that is likely to be sampled. Then each outcome  $P_{j,c}^k$  induces a probability

$$p(P_{j,c}^k | \mathcal{G}_k) = \prod_{n=1}^N p(m_{u_n} \in \bar{\mathcal{N}}_{u_{n-1}} | m_{u_n} \in \mathcal{N}_{u_{n-1}}).$$

We further consider a random event that  $m_j$  is sampled by the random walk approach. Obviously, such an event entails a series of experiment outcomes specified by all possible paths in  $\mathcal{P}_j^k$ . According to addition principle, we arrive at  $p(m_j) = \sum_c p(P_{j,c}^k | \mathcal{G}_k)$ .

Since the random walk process would stop if and only if it reaches a marker  $m_j \in \mathcal{D}_k$ , we have  $\sum_{m_j \in \mathcal{D}_k} p(m_j) = 1$ . Hence we can construct another probability space  $(\Omega', \mathcal{F}', P')$ , where  $\Omega' = \{m_j | m_j \in \mathcal{D}_k\}$  and  $p(m_j) = \sum_c p(P_{j,c}^k | \mathcal{G}_k)$ , which exactly characterizes the experiment where we draw a marker from  $\mathcal{D}_k$  with multinomial distribution.

### B.2 Well-Definedness of Alg. 1

To guarantee the well-definedness, we need to verify the fact that in the  $k$ -th step, the sum of probabilities for all possible sampled markers equal to one, under the settings of Alg. 1. We rely on mathematical induction to finish the proof. In the 0-th step, only the causal descendants of the source event marker could be possibly sampled, so the argument is obviously true with

$$\sum_{m_j \in \mathcal{N}_{i_0}} \rho_0(m_j) = \sum_{m_j \in \mathcal{N}_{i_0}} p(m_j \in \bar{\mathcal{N}}_{i_0} | m_j \in \mathcal{N}_{i_0}) = 1,$$

where the last equality is obvious based on the softmax function in (3).

Assume that in the  $(k - 1)$ -th step ( $k = 1, 2, \dots$ ), we have

$$\sum_{m_j \in \mathcal{D}_{k-1}} \rho_{k-1}(m_j) = 1.$$

Then in the  $k$ -th step, assume  $m_{i_k}$  to be the new sampled event and the true causal descendent of  $m_v$  (i.e.,  $m_{i_k} \in \bar{\mathcal{N}}_v$ ), then we have

$$\begin{aligned}
\sum_{m_j \in \mathcal{D}_k} \rho_k(m_j) &= \sum_{m_j \in \mathcal{D}_k} \rho_{k-1}(m_j) - \rho_{k-1}(m_v) \cdot p(m_{i_k} \in \overline{\mathcal{N}}_v | m_i \in \mathcal{N}_v) \\
&\quad + \sum_{\substack{m_i \in \mathcal{N}_{i_k} \\ m_i \notin \mathcal{D}_{k-1}}} (\rho_k(m_i) - \rho_{k-1}(m_i)) + \sum_{\substack{m_i \in \mathcal{N}_{i_k} \\ m_i \in \mathcal{D}_{k-1}}} \rho_k(m_i) \\
&= \sum_{m_j \in \mathcal{D}_k} \rho_{k-1}(m_j) - \rho_{k-1}(m_v) \cdot p(m_{i_k} \in \overline{\mathcal{N}}_v | m_i \in \mathcal{N}_v) \\
&\quad + \sum_{\substack{m_i \in \mathcal{N}_{i_k} \\ m_i \notin \mathcal{D}_{k-1}}} b_k \cdot p(m_i \in \overline{\mathcal{N}}_{i_k} | m_i \in \mathcal{N}_{i_k}) + \sum_{\substack{m_i \in \mathcal{N}_{i_k} \\ m_i \in \mathcal{D}_{k-1}}} b_k \cdot p(m_i \in \overline{\mathcal{N}}_{i_k} | m_i \in \mathcal{N}_{i_k}) \\
&= \sum_{m_j \in \mathcal{D}_k} \rho_{k-1}(m_j) - \rho_{k-1}(m_v) \cdot p(m_{i_k} \in \overline{\mathcal{N}}_v | m_i \in \mathcal{N}_v) \\
&\quad + \sum_{m_i \in \mathcal{N}_{i_k}} b_k \cdot p(m_i \in \overline{\mathcal{N}}_{i_k} | m_i \in \mathcal{N}_{i_k}) \\
&= \sum_{m_j \in \mathcal{D}_k} \rho_{k-1}(m_j) - \rho_{k-1}(m_v) \cdot p(m_{i_k} \in \overline{\mathcal{N}}_v | m_i \in \mathcal{N}_v) + b_k \\
&= \sum_{m_j \in \mathcal{D}_k} \rho_{k-1}(m_j).
\end{aligned}$$

Thus we have  $\sum_{m_j \in \mathcal{D}_k} \rho_k(m_j) = 1$  and conclude the proof.

### B.3 Equivalence of Alg. 1 to Random Walk Sampling

According to Theorem 2, we only need to prove that through Alg. 1, for any  $m_i \in \mathcal{D}_k$ ,  $\rho_k(m_i) = \sum_c p(P_{i,c}^k | \mathcal{G}_k)$ , which is true for  $k = 0, 1, \dots, T$ . We rely on strong mathematical induction to conduct the proof. For  $k = 0$ , the argument is obvious true according to Alg. 1. Assume that for  $k' = 0, \dots, k-1$  ( $k = 1, \dots, T$ ), we have the following property: for any  $m_j \in \mathcal{D}_{k'}$ ,  $\rho_k(m_i) = \sum_c p(P_{i,c}^{k'} | \mathcal{G}_{k'})$ . Then we need to prove the argument is true for  $k$ -th step.

For  $m_i \notin \mathcal{N}_{i_k}$ , we have  $\rho_k(m_i) = \rho_{k-1}(m_i) = \sum_c p(P_{i,c}^{k-1} | \mathcal{G}_{k-1}) = \sum_c p(P_{i,c}^k | \mathcal{G}_k)$ .

For  $m_i \in \mathcal{N}_{i_k}$ , consider two cases. If  $m_i \in \mathcal{D}_{k-1}$ , then

$$\begin{aligned}
\rho_k(m_i) &= \rho_{k-1}(m_i) + b_k \cdot p(m_i \in \overline{\mathcal{N}}_{i_k} | m_i \in \mathcal{N}_{i_k}) \\
&= \sum_c p(P_{i,c}^{k-1} | \mathcal{G}_{k-1}) + \rho_{k-1}(m_v) \cdot p(m_{i_k} \in \overline{\mathcal{N}}_v | m_i \in \mathcal{N}_v) \cdot p(m_i \in \overline{\mathcal{N}}_{i_k} | m_i \in \mathcal{N}_{i_k}) \\
&= \sum_c p(P_{i,c}^{k-1} | \mathcal{G}_{k-1}) + \sum_c p(P_{v,c}^{k-1} | \mathcal{G}_k) \cdot p(m_{i_k} \in \overline{\mathcal{N}}_v | m_i \in \mathcal{N}_v) \cdot p(m_i \in \overline{\mathcal{N}}_{i_k} | m_i \in \mathcal{N}_{i_k}) \\
&= \sum_c p(P_{i,c}^k | \mathcal{G}_k),
\end{aligned}$$

where the last equality is true due to the fact  $\mathcal{P}_i^k = \mathcal{P}_i^{k-1} \cup \mathcal{P}_v^{k-1}$ . If  $m_i \notin \mathcal{D}_{k-1}$ , then we have

$$\begin{aligned}
\rho_k(m_i) &= \rho_{k-1}(m_v) \cdot p(m_{i_k} \in \overline{\mathcal{N}}_v | m_i \in \mathcal{N}_v) \cdot p(m_i \in \overline{\mathcal{N}}_{i_k} | m_i \in \mathcal{N}_{i_k}) \\
&= \sum_c p(P_{v,c}^{k-1} | \mathcal{G}_k) \cdot p(m_{i_k} \in \overline{\mathcal{N}}_v | m_i \in \mathcal{N}_v) \cdot p(m_i \in \overline{\mathcal{N}}_{i_k} | m_i \in \mathcal{N}_{i_k}) \\
&= \sum_c p(P_{i,c}^k | \mathcal{G}_k),
\end{aligned}$$

where the last equality is based on the fact  $\mathcal{P}_i^k = \mathcal{P}_v^{k-1}$ . We conclude the proof.

## C Implementation Details

### C.1 Details of LANTERN-RNN

In LANTERN-RNN, we replace the multi-head attention unit by RNN structure to model the intensity function. Specifically,

$$\mathbf{h}_n = \phi(\mathbf{A}\mathbf{e}_n + \mathbf{B}\mathbf{h}_{n-1} + \mathbf{b}),$$

where  $\mathbf{A}, B \in \mathbb{R}^{D \times D}$ ,  $b \in \mathbb{R}^{D \times 1}$  and  $\phi$  is an activation function.

## C.2 Details of LANTERN-PR

In LANTERN-PR, we directly use a pre-defined reward function for generated event sequence as training signal of the generator. Assume the generated and ground-truth event sequences as  $\mathcal{S} = \{(t_k, m_{i_k})\}$  and  $\mathcal{S}^* = \{(t_k^*, m_{i_k}^*)\}$ , respectively, and we define the reward as

$$r_k = C - \|t_k - t_k^*\|^2 + \delta(m_{i_k} = m_{i_k}^*),$$

where  $\delta(s)$  is an indicator function which returns 1 if  $s$  is true and 0 otherwise, and  $C$  is a constant which guarantees positive reward value.

## C.3 Hyper-Parameter Settings

The settings for hyper-parameters are as follows: embedding dimension  $D = 10$  for Syn-Small,  $D = 16$  for Syn-Large,  $D = 8$  for MemeTracker,  $D = 16$  for Weibo; causal descendant sample size  $K = 3$  for Syn-Small and Syn-Large,  $K = 5$  for MemeTracker,  $K = 20$  for Weibo; number of attention heads  $L = 4$ ; regularization coefficient  $\lambda = 0.001$ ; time embedding weight  $\eta = 0.3$ ; discount factor  $\gamma = 0.99$ ; Adam parameters  $\alpha = 10^{-7}$ ,  $\beta_1 = 0.9$ ,  $\beta_2 = 0.99$  for generator, and  $\alpha = 10^{-5}$ ,  $\beta_1 = 0.9$ ,  $\beta_2 = 0.99$  for discriminator.

## D Model Training Algorithm

---

### Algorithm 2: Training Algorithm for LANTERN

---

- 1 **INPUT:**  $\{\mathcal{S}^*\}$ , ground-truth event sequences.  $\mathcal{M}$ , marker set. Initialized discriminator parameter  $w^0$ , generator parameter  $\theta^0$ . Adam hyper-parameter  $\alpha, \beta_1, \beta_2$ .
  - 2 **for**  $k = 1, \dots, n_{step}$  **do**
  - 3     Sample  $B$  observed event sequences  $\{\mathcal{S}_b^*\}_{b=1}^B$  from  $\{\mathcal{S}^*\}$ ;
  - 4     Generate event sequence  $\mathcal{S}_b$  given by the source event in  $\mathcal{S}_b^*$  by Alg. 1;
  - 5     Update generator parameter from  $\theta^k$  to  $\theta^{k+1}$  using (6);
  - 6      $\Delta L_D \leftarrow \frac{1}{B} \sum_{b=1}^B \sum_{k=1}^T \nabla_w \log d_k(\mathcal{S}_b; w) + \sum_{k=1}^T \nabla_w \log(1 - d_k(\mathcal{S}_b^*; w))$ ;
  - 7      $w^{k+1} \leftarrow \text{Adam}(\Delta L_D, w^k, \alpha, \beta_1, \beta_2)$ ;
  - 8      $\Delta L_G \leftarrow \frac{1}{B} \sum_{b=1}^B \sum_{k=1}^T \gamma^k \nabla_\theta \log \pi(a_k | s_k) \log d_k(\mathcal{S}_b; w) - \lambda \sum_{k=1}^T \nabla_\theta \log \pi(a_k | s_k) Q_{log}(a, s)$ ;
  - 9      $\theta^{k+1} \leftarrow \text{Adam}(\Delta L_G, \theta^k, \alpha, \beta_1, \beta_2)$ ;
  - 10 **OUTPUT:** discriminator parameter  $w$ , generator parameter  $\theta$ .
-
